# Supplementary material for: Genome-Wide Identification of MATE Gene Family in Potato (Solanum tuberosum L.) and Expression Analysis in Heavy Metal Stress
Source: Front Genet. 2021 May 28;12:650500. doi: 10.3389/fgene.2021.650500 (PMC8196238; doi:10.3389/fgene.2021.650500)
Supplement: Supplementary file 2 [file Table_2.XLSX]

## Sheet: Table S2
Table S2 Motif sequence identified by MEME tools in potato
Motif	Consensus sequence	Best Possible Match	E-value	Sites	width
1		VTGFGLLLGMASALETLCGQAYGAKQYHMLGIYLQRSIIVL	7.7E-1128	50	41
2		LKLAJPSAVMLCLEWWYFEILILLAGLLPNPELATSVLSIC	2.0E-976	50	41
3		NGIQPVLSGVARGCGWQKJVAYVNLGCYYLVGJPLGVLLGF	2.7E-975	47	41
4		LGQDPEIAKEAGKFALWLIPQJFAYALLQPJQRFLQAQSKV	9.6E-901	50	41
5		VYMIPFGLSAAASTRVSNELGAGNPKAAK	1.6E-644	49	29
6		ISQMFVGHLGELELAAASLAN	7.7E-361	50	21
7		JHVPLSWJLVYKLGLGLKGAA	4.6E-326	50	21
8		GSCKKTWTGFSWEAFKG	2.9e-274	46	17
9		RNVWGYLFTNEEEVVKYVAKLLPLLALSI	3.3E-396	50	29
10		JLLIITLRTBWEKZA	2.3e-169	41	15
11		EETKKLWRJAGPAIFTSLLQY	4.2e-243	50	21
12		SISWWJNVJALALYI	1.8e-145	42	15
13		FKLGVKGLWJGMJAG	1.3e-134	41	15
14		SIPISVLWLNSDKIL	8.9e-121	34	15
15		LLLPJYLFATPILKL	5.7e-73	22	15
16		RGFKDTRTPLFATVAGDLTNIILDPIFIFVFHWGVSGAAIAHVLSQYLISIILLWKLMTEVDLLPPSAKDLQFSKFLKNGFWLLARVIAVTFCVTLAAS	8.9e-71	3	99
17		FSVVVVVJTSFVIGLJLAVIV	1.1e-29	19	21
18		DKNVIRFIIIAIPFVAGTQPINSVAFVLDGVNFGANDFAYSAYSMVLVGALTITCEFFLYKTNGYIGIWIALAIFMVLRTFAGLWRMGTGTGPWRFLRIP	1.2e-29	2	100
19		QDEEISKVAKSYLIFLLPDLVATSFLNPLKAYLRTQNVTVP	8.9e-36	5	41
20		PIFVFFEDIRNVFKFDDLGMEILRIAFPAALALAADPIASL	1.4e-26	4	41
